# Supplementary material for: Calcium signaling through a transient receptor channel is important for Toxoplasma gondii growth
Source: eLife journal article supplement (doi:10.7554/elife.63417), 2021-06-09
Supplement: supp [file elife-63417-supp-v1.zip]

Archive with 20 entries (20 files):
- elife_poa_e63417_Figure_1_figure_supplement_1.tif
- elife_poa_e63417_Figure_2_figure_supplement_1.tif
- elife_poa_e63417_Figure_3_figure_supplement_1.tif
- elife_poa_e63417_Figure_5_figure_supplement_1.tif
- elife_poa_e63417_Supplementary_file_1.docx
- elife_poa_e63417_Supplementary_file_2.docx
- elife_poa_e63417_Supplementary_file_3.docx
- elife_poa_e63417_Supplementary_file_4.docx
- elife_poa_e63417_Figure_1_figure_supplement_1_source_data_1.xlsx
- elife_poa_e63417_Supplementary_file_2_source_data_1.xlsx
- elife_poa_e63417_Figure_2_source_data_1.xlsx
- elife_poa_e63417_Figure_3_source_data_1.xlsx
- elife_poa_e63417_Figure_3_figure_supplement_1_source_data_1.xlsx
- elife_poa_e63417_Figure_4_source_data_1.xlsx
- elife_poa_e63417_Figure_5_source_data_1.xlsx
- elife_poa_e63417_Figure_5_figure_supplement_1_source_data_1.xlsx
- elife_poa_e63417_Figure_6_source_data_1.xlsx
- elife_poa_e63417_Figure_7_source_data_1.xlsx
- elife_poa_e63417_Source_data_1.zip
- elife_poa_e63417_Transparent_Reporting_File.pdf
