# Supplementary material for: Calcium signaling through a transient receptor channel is important for Toxoplasma gondii growth
Source: eLife journal article supplement (doi:10.7554/elife.63417), 2021-06-09
Supplement: supp [file elife-63417-supp-v1.zip › elife_poa_e63417_Figure_1_figure_supplement_1_source_data_1.xlsx]

## Sheet: Sheet1
Figure 1 Supplementary 1- Source Data 1
Figure S1: Validation of C-terminal tagging of TgTRPPL-2-smHA.
Figure 1 Supplementary 1G: Quantification of Pearson’s coefficient of the co-localization of TgTRPPL2 with SAG1 or GAP45.
		Summary Statistics
		Sag1	Gap45
		0.514	0.006
		0.547	0.008
		0.492	0.128
		0.423	0.121
		0.423	0.214
		0.361
		0.59
