# Supplementary material for: Calcium signaling through a transient receptor channel is important for Toxoplasma gondii growth
Source: eLife journal article supplement (doi:10.7554/elife.63417), 2021-06-09
Supplement: supp [file elife-63417-supp-v1.zip › elife_poa_e63417_Figure_2_source_data_1.xlsx]

## Sheet: Sheet1
Figure 2-Source Data 1
Figure 2B: qPCR of total RNA from DTgTRPPL-2, DTgTRPPL-2-trppl2 and parental strain.
		Summary statistics
		Strain	RNE	Technical replicate	Biological replicate
		Parental	1	3	1
			1	3	2
			1	3	3
			1	3	4
			1	3	5
		DTgTRPPL-2	0.47166	3	1
			0.40706	3	2
			0.58318	3	3
		DTgTRPPL-2-trppl2	24.3586	3	1
			15.4329	3	2
			12.0782	3	3
			27.4231	3	4
			23.9427	3	5
Figure 2D: Plaque sizes from DTgTRPPL-2, DTgTRPPL-2-trppl2 and parental strain.
		Summary statistics
	Plaque sizes	Parental	9	10	6	7	8	7	6	8	6	7	11	7	19	12	11	10	10	11	8	18	11	13	11	11	7	6	9	9	6	6	7	7	8	8	10	9	8	9	9	8	21	31	13	14	21	25	16
		DTgTRPPL-2	4	4	2	4	3	4	4	4	4	4	5	4	3	5	4	4	5	7	5	3	3	4	6	3	6	6	4	4	4	4	3	4	4	4	4	5	3	3	4	4	3	5	4	5	3	7	7
		DTgTRPPL-2-trppl2	9	7	9	9	13	7	8	9	9	10	7	7	7	7	7	9	6	9	9	6	4	5	5	6	6	9	8	7	7	5	11	9	8	8	8	4	6	7	6	8	6	6	8	6	7	8	10
Figure 2E: Red green assays from DTgTRPPL-2, DTgTRPPL-2-trppl2 and parental strain.
		Summary statistics
			1.8 mM [Calcium]		0.5mM [Calcium]
			Parental	DTgTRPPL-2	Parental	DTgTRPPL-2
			38.9	32	43.1	33.3
			53.6	19.4	33.3	32.7
			53.5	37	40.2
			61.9	28.5	34.2
			71.3	26.2	38.5
			61
			54
			52
			49.5
Figure 2F: Egress assays from DTgTRPPL-2, DTgTRPPL-2-trppl2 and parental strain.
		Summary statistics
			Parental			DTgTRPPL-2
		1.8 mM [Calcium]	+	-	+	+	-	+
		Zaprinast	-	+	+	-	+	+
			387	157.6	96	372	128	401
			354	160	93	348	350	51
			261	162	68	420	200	401
			435	163	112	375	191	80
			450	131	89	381	273	106
			297	156	114	516	153	99
			282	116	87	516	301	301
			158	120	84	525	301	93
			143	96	89	218	301	105
			219	162	148	194	301	136
			222	92	91	203	114	301
			366	114	137	203	133	86
			360	80	101	215	131	134
			351	111	67	215	143	220
			264	130	154	639	76	161
			456			657		301
			435			690		119
			360			690		301
			354			452		301
			258			690		93
			267			473
			258			407
			261			434
			450			341
			83			437
			89			335
			216			353
			186			329
			201			395
			204			690
			219			690
			219			690
			206			690
			218			690
			197			690
			194			690
			212			690
			212			690
			200			690
			218			690
			218			690
			206			690
			224			539
			401			690
			404			636
			404			537
			416			537
			405			609
			326			612
			299			404
			287			434
			290			440
			311			413
			477			401
			465
			350
			383
			392
			356
			165
			175
			180
			190
			210
			210
			165
			170
			170
			175
			170
			180
			180
			175
			229
			229
			229
			219
			219
			219
[truncated: 178 more columns]
