# Supplementary material for: Calcium signaling through a transient receptor channel is important for Toxoplasma gondii growth
Source: eLife journal article supplement (doi:10.7554/elife.63417), 2021-06-09
Supplement: supp [file elife-63417-supp-v1.zip › elife_poa_e63417_Figure_3_figure_supplement_1_source_data_1.xlsx]

## Sheet: Sheet1
Figure 3 Supplementary Figure 1- Source Data 1
Figure 3 Supplementary Figure 1: TgTRPPL-2 regulates Ca2+ in T. gondii.
Figure 3 Supplementary Figure 1C: Change in cytosolic Ca2+ 15 s after the addition of Zaprinast (Labeled Zaprinast) and 20 s after the addition of 1.8 mM of extracellular Ca2+ (Labeled Ca2+ after Zaprinast).
		Summary statistics
		Zaprinast					Calcium after Zaprinast
		Parental	DTgTRPPL-2	DTgTRPPL-2-trppl2			Parental	DTgTRPPL-2
		281.671	257.267	1642.86			189.458	85.697
		223.144	227.269	3196.07			112.108	104.647
		441.283	223.928	1697.91			134.64	122.849
		364.097	194.37	2605.2			132.674	96.779
		332.96					164.156
		385.018					241.797
		365.932					166.824
		349.897					132.976
