# Supplementary material for: Calcium signaling through a transient receptor channel is important for Toxoplasma gondii growth
Source: eLife journal article supplement (doi:10.7554/elife.63417), 2021-06-09
Supplement: supp [file elife-63417-supp-v1.zip › elife_poa_e63417_Figure_3_source_data_1.xlsx]

## Sheet: Sheet1
Figure 3-Source Data 1
Figure 3: The role of TgTRPPL-2 in PM Ca2+ influx
Figure 3C: Quantification and statistical analysis of the change in cytosolic Ca2+ during the first 20 s after addition of extracellular Ca2+.
	Summary statistics
		Parental	DTgTRPPL-2	DTgTRPPL-2-trppl2
		92.673	72.945	132.219
		99.16	68.956	136.803
		128.576	54.141	169.178
		64.216	60.632	398.77
		129.288	81.735	396.374
		95.219	50.854	284.344
		112.021	35.905	271.495
		77.1782	53.916
		111.831
		143.162
		80.8182
		149.328
		89.7296
		87.2168
Figure 3E: Quantification and statistical analysis of the slopes from D.
	Summary statistics
		Parental	DTgTRPPL-2	DTgTRPPL-2-trppl2
		0.06935	0.08986	1.416
		0.2019	-0.0004593	1.189
		0.1719	0.09388	0.9602
		0.1454	0.1011	0.9602
		0.08382	0.09699
		0.08951
		0.2067
		0.164
		0.06787
		0.1841
		0.1644
		0.2045
		0.06743
		0.061
		0.2049
		0.1455
Figure 3G: Quantification and statistical analysis of the change in cytosolic Ca2+ at 50 s after the addition of Thap.
	Summary statistics
		Parental	DTgTRPPL-2	DTgTRPPL-2-trppl2
		207.058	37.271	144.342
		131.169	31.627	99.53
		117.031	34.46	184.79
		121.431	39.595	154.841
		166.537	43.003	229.982
		177.091	65.755	245.835
		53.553	79.982	172.685
		59.519	97.07	91.026
		198.561	79.982
		51.157	97.07
		151.611	107.584
		218.201	102.21
		156.258
Figure 3H: Quantification and statistical analysis of the change in cytosolic Ca2+ 20 s after the addition of 1.8 mM of Ca2+
	Summary statistics
		Parental	DTgTRPPL-2	DTgTRPPL-2-trppl2
		279.134	70.296	162.294
		214.484	59.22	713.751
		123.63	116.656	439.248
		403.282	101.154	373.574
		260.091		352.206
		174.688		458.021
		200		456.776
		376.008
Figure 3J: Quantification and statistical analysis of cytosolic Ca2+ increase during the first 15 s after adding Zaprinast
	Summary statistics
		Parental	DTgTRPPL-2	DTgTRPPL-2-trppl2
		1060.73	398.396	3331.33
		1006.04	374.03	2137.47
		1173.57	294.554	2037.72
		1154.3	274.384	1801.29
		1483.21
Figure 3K: Quantification and statistical analysis of Ca2+ influx during the 20 s after adding Ca2+ without additions (ND) or after adding Thap or Za
	Summary statistics
		Parental			DTgTRPPL-2
		ND	Thap	Zap	ND	Thap	Zap
		92.673	279.134	189.458	72.945	70.296	85.697
		99.16	214.484	112.108	68.956	59.22	104.647
		128.576	123.63	134.64	54.141	116.656	122.849
		64.216	403.282	132.674	60.632	101.154	96.779
		58.742	260.091	164.156	81.735
		129.288	174.688	241.797	50.854
		95.219	200	166.824	35.905
		112.021	376.008	132.976	53.916
		77.1782
		111.831
		143.162
		60.9512
		80.8182
		149.328
		89.7296
		87.2168
