# Supplementary material for: Calcium signaling through a transient receptor channel is important for Toxoplasma gondii growth
Source: eLife journal article supplement (doi:10.7554/elife.63417), 2021-06-09
Supplement: supp [file elife-63417-supp-v1.zip › elife_poa_e63417_Figure_4_source_data_1.xlsx]

## Sheet: Sheet1
Figure 4- Source Data 3
Figure 4: Characterization of TgTRPPL-2 expressed in HEK-3KO cells.
Figure 4E: Current-Voltage relationship comparing single channel current amplitude of control, PC2 and TgTRPPL-2 expressing cells from D.
		Summary statistics
		Control							TgTRPPL-2							PC2
		-80	-60	-40	-20	0	20	40	-80	-60	-40	-20	0	20	40	-80	-60	-40	-20	0	20	40
		-0.81	-0.69	-1	-0.75	0	0	0.56	-2.28	-3.25	-1.52	-0.87	0	0.96	1.64	-2.9	-6.09	-3.247	-3.857	0	1.63	1.84
		-1.75	-2.41	-3.65	-0.59	0	0	0.98	-5.1	-1.36	-0.86	-0.86	0	0.96	0.89	-2.79	-4.67	-1.263	-2.436	0	1.079	2.7
		-2.02	-1.83	-1.74	-0.88	0	0	1.25	-4.32	-2.79	-1.92	-0.78	0	0.77	1.31	-2.97	-1.67	-1.399	-0.804	0	1.246	2.11
		-2.31	-2.05	-1.92	-1.06	0	0	1.35	-1.63	-2.69	-1.64	-0.679	0	0.838	1.34	-2.49	-1.896	-0.973	-1.75	0	0.86	1.566
		-1.93				0	0	1.45	-2.68	-1.62	-1.64	-0.68	0	0.78	1.57	-1.94	-1.732	-1.717	-1.46	0		1.463
		-1.25				0	0	2.51	-4.86	-2.14	-1.15	-2.98	0	3.27	1.1	-1.31	-1.351	-0.96				2.8
		-1.83				0	0		-4.82	-2.93	-1.73	-1.92	0		3.36	-1.44	-1.83	-0.87				3.65
		-0.8							-4.6	-3.14	-3.33	-1.09	0		2.98	-0.916	-1.48	-1.6
									-5.07	-2.98	-1.63	-0.96	0		1.64	-1.64	0.04	-2.04
									-9.39	-3.24	-2.04	-1.64	0		1.63	-2.56	-1.42	-2.93
									-6.82	-3.27	-5.45	-2.46	0		4.36	-2.56	-3.22
									-3.14	-8.47	-1.09	-0.95	0			-2	-4.38
									-3.14	-5.86	-3.97		0			-2.19	-3.97
									-2.18	-1.64	-2.73		0			-2.92	-2.04
									-3.82	-2.31	-1.64		0			-3.21	-1.39
									-3.69	-3.27	-2.32		0			-3.7
										-5.72			0			-2.04
										-2.04			0			-1.69
																-0.96
																-1.15
Figure 4F: Current-Voltage relationship comparing single channel current amplitude of TgTRPPL-2 expressing cells at 1.8 and 10 mM [Ca2+] inside the pipette.
		Summary statistics
		1.8 mM							10 mM
		-80	-60	-40	-20	0	20	40	-80	-60	-40	-20	0	20	40
		-2.28	-3.25	-1.52	-0.87	0	0.96	1.64	-1.08	-0.6	-1.11	-1.3	0	1.528	1.11
		-5.1	-1.36	-0.86	-0.86	0	0.96	0.89	-0.81	-0.97	-1.73	-1.29	0	1.629	1.08
		-4.32	-2.79	-1.92	-0.78	0	0.77	1.31	-0.51	-0.84	-1.29	-1.07	0	3.99	1.07
		-1.63	-2.69	-1.64	-0.679	0	0.838	1.34	-1.86	-0.522	-1.3	-0.86	0	0.414	0.86
		-2.68	-1.62	-1.64	-0.68	0	0.78	1.57	-1.92	0.519	-1.51	-1.29	0
		-4.86	-2.14	-1.15	-2.98	0	3.27	1.1	-2.37	-2.05	-1.34	-0.573	0
		-4.82	-2.93	-1.73	-1.92	0		3.36	-2.39	-1.51		-4.98	0
		-4.6	-3.14	-3.33	-1.09	0		2.98	-1.95	-1.51		0	0
		-5.07	-2.98	-1.63	-0.96	0		1.64	-2.59	-1.51		-0.479	0
		-9.39	-3.24	-2.04	-1.64	0		1.63	-2.11	-2.16		-0.411	0
		-6.82	-3.27	-5.45	-2.46	0		4.36	-1.13	-1.63			0
		-3.14	-8.47	-1.09	-0.95	0			-0.47	-0.71			0
		-3.14	-5.86	-3.97		0			-0.59	-0.41			0
		-2.18	-1.64	-2.73		0			-0.71	-0.42			0
		-3.82	-2.31	-1.64		0			-1.19	-0.47			0
		-3.69	-3.27	-2.32		0			-1.52	-0.77			0
			-5.72			0			-1.64	-1.6			0
			-2.04			0			-0.92	-0.88			0
									-0.72	-1.29
									-4.15	-1.28
										-1.63
										-0.7
Figure 4H: Current-voltage relationship comparing single channel current amplitude of TgTRPPL-2 expressing cells at 0.1 and 10 μM [Ca2+] in the bath solution.
		Summary statistics
		0.1 mM							10 mM
		-80	-60	-40	-20	0	20	40	-80	-60	-40	-20	0	20	40
		-2.28	-3.25	-1.52	-0.87	0	0.96	1.64	-8.11	-9.19	-6.2	-2.35	0	4.05	12.17
		-5.1	-1.36	-0.86	-0.86	0	0.96	0.89	-10.47	-3.42	-5.12		0	3.85	9.06
		-4.32	-2.79	-1.92	-0.78	0	0.77	1.31	-7.77	-13.88	-1.74		0	1.905	14.24
		-1.63	-2.69	-1.64	-0.679	0	0.838	1.34	-3.26	-26.93			0		6.99
		-2.68	-1.62	-1.64	-0.68	0	0.78	1.57	-6.02	-3.34			0		2.697
		-4.86	-2.14	-1.15	-2.98	0	3.27	1.1		-3.01			0
		-4.82	-2.93	-1.73	-1.92	0		3.36		-3.48			0
		-4.6	-3.14	-3.33	-1.09	0		2.98					0
		-5.07	-2.98	-1.63	-0.96	0		1.64					0
		-9.39	-3.24	-2.04	-1.64	0		1.63					0
		-6.82	-3.27	-5.45	-2.46	0		4.36					0
		-3.14	-8.47	-1.09	-0.95	0							0
		-3.14	-5.86	-3.97		0							0
		-2.18	-1.64	-2.73		0
		-3.82	-2.31	-1.64		0
		-3.69	-3.27	-2.32		0
			-5.72			0
			-2.04			0
Figure 4I: Open probability of control and TgTRPPL-2 expressing cells in the presence of different [Ca2+] in the bath solution in comparison to the Control.
		Summary statistics
		Control			TgTRPPL-2 (0.1 mM)			TgTRPPL-2 (10 mM)
		-40	-60	-80	-40	-60	-80	-40	-60	-80
		0.48	0.27	0.27	0	0.965956	0.455017	0	0.519259	0.997121
		0.9	0.55	0.62	0.676745	0	0.930509	0.329652	0.464673	0.979285
		0.69	0.26	0.23	0	0	0.978084	0.489719	0.231071	0.973468
		0.59	0.6	0.1	0	0.485359	0.638543	0.990743	0.986113	0.957372
		0.26	0.85	0.75	0.500055	0	0.672216	0.751037	0.977551	0.867426
		0	0.9	0.39	0.285573	0.710093	0	0.333734	0.827147
		0	0	0.49	0.98238	0.000519	0.6753
		0	0	0.04	0.531398	0.341883	0.675291
		0	0	0.07	0.999051	0.998791	0.661759
		0	0	0.02	0	0.76052	0.488656
		0	0	0.09	0	0.744673	0.997191
		0	0	0	0	0	0.670583
		0	0	0	0.509461	0.675366	0.838817
		0	0	0	0.695416	0.3288	0.669164
		0	0	0	0.777098	0.462933	0.75354
		0	0	0	0.978041	0.935689	0.975845
		0	0	0	0	0.887252	0.892758
		0	0	0	0.830838	0.999011	0
		0	0	0	0	0.500021	0.941835
		0	0	0	0	0.935817	0.910281
		0	0	0	0.267632	0.354078	0.365067
		0	0	0	0	0.97719	0.956432
		0	0	0	0	0.489178	0.96706
		0	0	0	0	0	0
		0	0	0	0.687545	0.662589	0.515462
					0.942594	0.913884	0.827742
					0.900861	0.903121	0.903969
					0.986079	0.985942	0.989863
					0.961623	0.960463	0.987144
					0.957134	0.935753	0.915371
					0	0.500004	0.966844
					0	0	0
					0.882829	0.835796	0.965783
					0	0.836815	0.96714
					0	0.937553	0.646596
					0.909073	0.799029	0
