# Supplementary material for: Calcium signaling through a transient receptor channel is important for Toxoplasma gondii growth
Source: eLife journal article supplement (doi:10.7554/elife.63417), 2021-06-09
Supplement: supp [file elife-63417-supp-v1.zip › elife_poa_e63417_Figure_5_figure_supplement_1_source_data_1.xlsx]

## Sheet: Sheet1
Figure 5 Supplementary- Source Data 1
Figure 5 Supplementary Figure 1: Measurement of ER Calcium of HEK-3KO cells expressing TgTRPPL-2.
Figure 5 Supplementary 1C: Quantification of the slope of fluorescence in B comparing TgTRPPL-2-HEK-3KO cells versus the control cells.
		Summary statistics
		Control	TgTRPPL-2
		-1.21	-3.37
		-0.922	-2.508
		-0.715	-2.72
		-0.473
Figure 5 Supplementary Figure 1E: Quantification of the slope of fluorescence in D comparing TgTRPPL-2-HEK-3KO cells versus control cells.
		Summary statistics
		Control	TgTRPPL-2
		-2.13	-13.07
		-0.58	-2.27
		-1.19	-4.09
		-0.56	-6.01
		-0.41	-3.74
Figure 5 Supplementary Figure 1G: Quantification of the slope of fluorescence of patched TgTRPPL-2-HEK-3KO nuclear extracts in different experimental conditions. Slope of the fluorescence was quantified based on the 5 technical replicates of the artificial membrane depolarization in each cell analyzed.
		Summary statistics
		KCl	CsCl
		-3.37	-13.07
		-2.508	-2.27
		-2.72	-4.09
			-6.01
			-3.74
