# Supplementary material for: Calcium signaling through a transient receptor channel is important for Toxoplasma gondii growth
Source: eLife journal article supplement (doi:10.7554/elife.63417), 2021-06-09
Supplement: supp [file elife-63417-supp-v1.zip › elife_poa_e63417_Figure_5_source_data_1.xlsx]

## Sheet: Sheet1
Figure 5- Source Data 4
Figure 5: TgTRPPL-2 permeates Ca2+.
Figure 5B: Current-voltage relationship comparing single-channel current amplitude of TgTRPPL-2 cells in 1.8 mM in KCl (blue) or CsCl (green) buffer.
		Summary statistics
		TgTRPPL-2
		KCl							CsCl
		-80	-60	-40	-20	0	20	40	-80	-60	-40	-20	0	20	40
		-2.28	-3.25	-1.52	-0.87	0	0.96	1.64	-1.65	-4.31	-0.89	-1.15		2.03	1.27
		-5.1	-1.36	-0.86	-0.86	0	0.96	0.89	-3.67	-1.02	-1.64	-1.9		1.77	3.93
		-4.32	-2.79	-1.92	-0.78	0	0.77	1.31	-6.34	-1.65	-1.77	-0.633		0.76	2.31
		-1.63	-2.69	-1.64	-0.679	0	0.838	1.34	-3.29	-2.03	-2.54	-0.507		1.27	0.76
		-2.68	-1.62	-1.64	-0.68	0	0.78	1.57	-4.56	-2.79	-2.79	-0.71		1.14	0.76
		-4.86	-2.14	-1.15	-2.98	0	3.27	1.1	-4.7	-2.66	-0.886	-0.99		0.86	0.76
		-4.82	-2.93	-1.73	-1.92	0		3.36	-4.06	-1.78	-0.633	-0.71		1	1.15
		-4.6	-3.14	-3.33	-1.09	0		2.98	-1.52	-1.02	-0.756	-0.57		0.851	1.143
		-5.07	-2.98	-1.63	-0.96	0		1.64	-2.41	-1.27	-0.886	-0.84		0.994	0.89
		-9.39	-3.24	-2.04	-1.64	0		1.63	-1.4	-1.14	-1.53				1.65
		-6.82	-3.27	-5.45	-2.46	0		4.36	-2.03	-3.3	-1.01				1.27
		-3.14	-8.47	-1.09	-0.95	0			-2.15	-4.43	-1.02				0.89
		-3.14	-5.86	-3.97		0			-1.52	-1.9	-1.39				1.02
		-2.18	-1.64	-2.73		0			-6.83	-1.52	-2.28				0.64
		-3.82	-2.31	-1.64		0			-6.34	-1.044	-1.56				1.3
		-3.69	-3.27	-2.32		0			-3.55	-3.42	-1.86				1.28
			-5.72			0			-2.16	-3.14	-1.71				1.57
			-2.04			0			-2.03	-2.85	-1.72				1.28
									-1.04	-3.23	-1.85				1.28
									-4.28	-3.56	-1.1				1.14
									-5.27	-3.28
									-5.42
									-4.42
									-4.71
									-5.28
									-4.85
									-2.82
Figure 5C: Calculated open probability of TgTRPPL-2 expressing cells in the presence of 1.8 mM Ca2+ in a KCl (blue) or CsCl (green) buffer.
		Summary statistics
		KCl			CsCl
		-40	-60	-80	-40	-60	-80
		0	0.965956	0.455017	0.49995	0.659831	0.892318
		0.676745	0	0.930509	0.7933	0.694653	0.958459
		0	0	0.978084	0.49936	0.499183	0.188018
		0	0.485359	0.638543	0.47724	0.479468	0.978153
		0.500055	0	0.672216	0.31823	0.94152	0.379478
		0.285573	0.710093	0	0.49996	0.458967	0.709516
		0.98238	0.000519	0.6753	0.51753	0.562469	0
		0.531398	0.341883	0.675291	0.49865	0.961716	0
		0.999051	0.998791	0.661759	0.47719	0.47556	0.96192
		0	0.76052	0.488656	0.49817	0.711518	0.333353
		0	0.744673	0.997191	0.33335	0.860063	0.451611
		0	0	0.670583	0.8007	0	0.958877
		0.509461	0.675366	0.838817	0.07786	0.990587	0.0495174
		0.695416	0.3288	0.669164	0.74751	0.928253	0.945834
		0.777098	0.462933	0.75354	0.88733	0.938303	0.402356
		0.978041	0.935689	0.975845	0	0.962063	0.979933
		0	0.887252	0.892758	0.51089	0.960597	0.484468
		0.830838	0.999011	0	0	0.982641	0.458967
		0	0.500021	0.941835	0.33333	0.72457	0.401206
		0	0.935817	0.910281	0	0	0.498654
		0.267632	0.354078	0.365067	0	0.989035	0.938962
		0	0.97719	0.956432	0.61711	0	0.883025
		0	0.489178	0.96706	0	0.689717	0.371699
		0	0	0	0.68972	0.774876
		0.687545	0.662589	0.515462	0	0.735378
		0.942594	0.913884	0.827742
		0.900861	0.903121	0.903969
		0.986079	0.985942	0.989863
		0.961623	0.960463	0.987144
		0.957134	0.935753	0.915371
		0	0.500004	0.966844
		0	0	0
		0.882829	0.835796	0.965783
		0	0.836815	0.96714
		0	0.937553	0.646596
		0.909073	0.799029	0
Figure 5D: Average time of channel openings (dwell time) of TgTRPPL-2 expressing cells in the presence of 1.8 mM Ca2+ in a KCl (blue) or CsCl (green).
		Summary statistics
		KCl			CsCl
		-40	-60	-80	-40	-60	-80
		0	30.91	7.512	27.24	19.55	1.69
		17.79	0	7.188	29.31	24.06	16.18
		0	0	6.492	33.19	23.27	27.14
		0	93.43	7.677	30.08	26.17	13.46
		29.17	0	6.216	41.25	28.92	0
		77.3	24.93	0	18.75	14.25	22.36
		10.59	13.01	26.67	12.51	12.36	22.03
		22.9	3	15.79	24.61	0	0
		8.861	69.74	3.198	26.01	17.24	10.38
		0	10.05	4.666	0	13.53	21.23
		0	16.09	9.71	20.77	11.22	6.619
		0	22.06	13.74	21.23	10.31	11.83
		17.96	0	26.41	13.59	10.68	1.416
		32.29	24.39	0	16.86	98.63	41.44
		33.9	40.59	18.18	123	57.05	45.31
		10.63	64.29	15.02	25.59	68.43	53.47
		16.2	77.93	20.08	18.3	87.58	51.04
		0	16.77	8.595	3.445	2.593	14.25
		57.57	29.04	4.401	37.02	26.48	20.74
		26.56	14.2	50.76	0	0	24.61
		0	9.731	64.46	0	18.54	17.38
		0	8.645	46.09	0	0	25.24
		6.78	6.766	19.22	33.19	23.02	8.436
		0	7.9	0	0	39.55
		0	7.231	38.99	23.02	25.9
		0	0	87
		16.35	18.49	34.91
		24.28	20.6	40.28
		3.154	3.189	57.82
		4.68	4.775	59.82
		10.66	11.64	16.97
		14.11	13.98	30.81
		22	17.59	0
		0	24.74	39.93
		0	0	3.21
		17.99	23.69
		0	16.38
		0	16.59
		11.26	12.82
