# Supplementary material for: Calcium signaling through a transient receptor channel is important for Toxoplasma gondii growth
Source: eLife journal article supplement (doi:10.7554/elife.63417), 2021-06-09
Supplement: supp [file elife-63417-supp-v1.zip › elife_poa_e63417_Figure_6_source_data_1.xlsx]

## Sheet: Sheet1
Figure 6- Source Data 5
Figure 6: Regulation of TgTRPPL-2 by Ca2+ and inhibition by TRP inhibitors.
Figure 6C: Percentage inhibition of Ca2+ influx in the presence of 1 µM of ACA.
		Summary statistics
		Parental	DTgTRPPL-2	DTgTRPPL-2-trppl2
		72.113	0	85.6043
		78.8499	0	76.0365
		27.4824	0	57.2536
		56.8811	0	45.5781
		69.8668	3	23.6712
		78.2915	0	30.1455
		29.1539	0	51.6339
		56.7303	0	47.8794
		54.917		17.9318
		71.766
		66.2203
Figure 6D: Change in cytosolic Ca2+ during the first 20 s after addition of Ca2+ in the presence of 10 µM of Nifedipine or 1 µM ACA.
		Summary statistics
		Parental			DTgTRPPL-2			DTgTRPPL-2-trppl2
		Calcium	Nifedipine	ACA	Calcium	Nifedipine	ACA	Calcium	Nifedipine	ACA
		92.673	37.056	46.047	72.945	9.121	55.112	132.219	33.724	55.835
		99.16	29.061	35.845	68.956	5.311	57.909	136.803	35.754	99.599
		128.576	25.623	55.777	54.141	-7.869	52.956	169.178	69.444	126.803
		64.216	44.984	74.441	60.632	11.348	55.362	398.77	61.889	177.846
		129.288	43.432	71.198	81.735	74.243	57.658	396.374	67.432	162.761
		95.219	30.666	49.756	50.854	20.107	57.909	284.344	147.578	112.693
		112.021		46.62	35.905		91.429	271.495		121.441
		77.1782		34.923	53.916		104.834
		111.831		71.447
		143.162
		80.8182
		149.328
		89.7296
		87.2168
Figure 6F: Quantification and statistical analysis of the slope 50 s after the addition of Thap in the presence or absence of ACA in parental and the DTgTRPPL-2 mutant.
		Summary statistics
		Parental		DTgTRPPL-2
	ACA	-	+	-
		5.068	1.569	1.889
		2.934	1.552	2.28
		1.353	2.876	2.539
		4.831	3.354	2.302
		3.351	1.363	0.9721
		7.633	0.935	0.8476
		4.672		0.8849
		2.155		0.9248
		7.633		1.298
		5.585		1.628
		2.791		1.889
				2.28
Figure 6H: Quantification of change of cytosolic Ca2+ 20 s after the addition of 1.8 mM Ca2+ following the addition of Thap under different conditions.
		Summary statistics
		Parental					DTgTRPPL-2
Time after Thap		0	50s		300s
	ACA	-	-	+	-	+	-
		155.416	431.675	138.91	279.134	67.998	70.296
		120.801	240.979	157.612	214.484	67.075	59.22
		62.084	127.198	93.413	174.688	122.717	116.656
		90.007	123.11	86.973	200	148.715	101.154
		93.672	555.482		376.008	56.827
		84.602			183.188	64.575
		55.197			390.813
		34.383			102.167
		131.374			117.331
		105.98			390.813
		136.352			353.018
		83.951			328.136
		54.424
		99.346
		91.39
		199.333
		126.284
		131.374
		199.333
		126.284
		131.374
		155.416
		120.801
		131.374
		105.98
		136.352
		84.602
		83.951
		99.346
