# Supplementary material for: Calcium signaling through a transient receptor channel is important for Toxoplasma gondii growth
Source: eLife journal article supplement (doi:10.7554/elife.63417), 2021-06-09
Supplement: supp [file elife-63417-supp-v1.zip › elife_poa_e63417_Figure_7_source_data_1.xlsx]

## Sheet: Sheet1
Figure 7- Source Data 6
Figure 7: TRP Inhibitors decreased the activity of TgTRPPL-2.
Figure 7B: Calculated open probability of TgTRPPL-2 expressing cells (black) or in the presence of ACA (blue).
		Summary statistics
		Control			TgTRPPL-2			ACA
		-40	-60	-80	-40	-60	-80	-40	-60	-80
		0.48	0.27	0.27	0	0.965956	0.455017	0.778454	0.85067	0.551881
		0.9	0.55	0.62	0.676745	0	0.930509	0.963444	0.948298	0.883494
		0.69	0.26	0.23	0	0	0.978084	0.964828	0.947251	0.8945
		0.59	0.6	0.1	0	0.485359	0.638543	0.78996	0.982057	0.954847
		0.26	0.85	0.75	0.500055	0	0.672216	0.422281	0	0.856551
		0	0.9	0.39	0.285573	0.710093	0	0.389602	0.701766	0.825807
		0	0	0.49	0.98238	0.000519	0.6753	0	0	0.608684
		0	0	0.04	0.531398	0.341883	0.675291	0	0	0.618561
		0	0	0.07	0.999051	0.998791	0.661759	0	0	0.946491
		0	0	0.02	0	0.76052	0.488656	0	0	0
		0	0	0.09	0	0.744673	0.997191	0	0	0
		0	0	0	0	0	0.670583	0	0	0
		0	0	0	0.509461	0.675366	0.838817	0	0	0
		0	0	0	0.695416	0.3288	0.669164	0	0	0
		0	0	0	0.777098	0.462933	0.75354	0	0	0
		0	0	0	0.978041	0.935689	0.975845	0	0	0
		0	0	0	0	0.887252	0.892758			0
		0	0	0	0.830838	0.999011	0			0
		0	0	0	0	0.500021	0.941835			0
		0	0	0	0	0.935817	0.910281			0.690645
		0	0	0	0.267632	0.354078	0.365067			0.851615
		0	0	0	0	0.97719	0.956432
		0	0	0	0	0.489178	0.96706
		0	0	0	0	0	0
		0	0	0	0.687545	0.662589	0.515462
					0.942594	0.913884	0.827742
					0.900861	0.903121	0.903969
					0.986079	0.985942	0.989863
					0.961623	0.960463	0.987144
					0.957134	0.935753	0.915371
					0	0.500004	0.966844
					0	0	0
					0.882829	0.835796	0.965783
					0	0.836815	0.96714
					0	0.937553	0.646596
					0.909073	0.799029	0
Figure 7C: Calculated open probability of TgTRPPL-2 expressing cells (black) or in the presence of Benzamil (red).
		Summary statistics
		Control			TgTRPPL-2			Benzamil
		-40	-60	-80	-40	-60	-80	-40	-60	-80
		0.48	0.27	0.27	0	0.965956	0.455017	0.446218	0.577302	0.981835
		0.9	0.55	0.62	0.676745	0	0.930509	0.820772	0.992745	0.855445
		0.69	0.26	0.23	0	0	0.978084	0.583152	0.731158	0.875515
		0.59	0.6	0.1	0	0.485359	0.638543	0.617512	0.62621	0.967424
		0.26	0.85	0.75	0.500055	0	0.672216	0	0	0.986423
		0	0.9	0.39	0.285573	0.710093	0	0	0	0.535353
		0	0	0.49	0.98238	0.000519	0.6753	0	0	0.305387
		0	0	0.04	0.531398	0.341883	0.675291	0	0	0
		0	0	0.07	0.999051	0.998791	0.661759	0	0	0
		0	0	0.02	0	0.76052	0.488656	0	0	0
		0	0	0.09	0	0.744673	0.997191	0	0	0
		0	0	0	0	0	0.670583	0	0	0
		0	0	0	0.509461	0.675366	0.838817	0	0	0
		0	0	0	0.695416	0.3288	0.669164	0	0	0
		0	0	0	0.777098	0.462933	0.75354	0	0	0
		0	0	0	0.978041	0.935689	0.975845	0	0	0
		0	0	0	0	0.887252	0.892758
		0	0	0	0.830838	0.999011	0
		0	0	0	0	0.500021	0.941835
		0	0	0	0	0.935817	0.910281
		0	0	0	0.267632	0.354078	0.365067
		0	0	0	0	0.97719	0.956432
		0	0	0	0	0.489178	0.96706
		0	0	0	0	0	0
		0	0	0	0.687545	0.662589	0.515462
					0.942594	0.913884	0.827742
					0.900861	0.903121	0.903969
					0.986079	0.985942	0.989863
					0.961623	0.960463	0.987144
					0.957134	0.935753	0.915371
					0	0.500004	0.966844
					0	0	0
					0.882829	0.835796	0.965783
					0	0.836815	0.96714
					0	0.937553	0.646596
					0.909073	0.799029	0
Figure 7D: Average time of channel opening (dwell time) of TgTRPPL-2 expressing cells in the presence of TRP inhibitors.
		Summary statistics
		Control			TgTRPPL-2			Benzamil
		-40	-60	-80	-40	-60	-80	-40	-60	-80
		0	30.91	7.512	16.12	16.12	10.08	70.39	85.71	118.1
		17.79	0	7.188	18.18	16.64	21.26	41.36	33.14	26.67
		0	0	6.492	36.02	35.99	53.81	38.29	48.53	32.41
		0	93.43	7.677	14.95	11.5	16.85	0	38.06	43.65
		29.17	0	6.216	10.45	0	19.3	0	0	71.28
		77.3	24.93	0	19.86	46.01	21.14	0	0	43.88
		10.59	13.01	26.67	0	0	14.66	0	0	24.33
		22.9	3	15.79	0	0	17.95	0	0	0
		8.861	69.74	3.198	0	0	12.34	0	0	0
		0	10.05	4.666	0	0	0	0	0	0
		0	16.09	9.71	0	0	0	0	0	0
		0	22.06	13.74	0	0	0	0	0	0
		17.96	0	26.41	0	0	0	0	0	0
		32.29	24.39	0	0	0	0	0	0	0
		33.9	40.59	18.18	0	0	0	0	0	0
		10.63	64.29	15.02			0		0	0
		16.2	77.93	20.08			0
		0	16.77	8.595			0
		57.57	29.04	4.401			0
		26.56	14.2	50.76			18.87
		0	9.731	64.46			5.261
		0	8.645	46.09
		6.78	6.766	19.22
		0	7.9	0
		0	7.231	38.99
		0	0	87
		16.35	18.49	34.91
		24.28	20.6	40.28
		3.154	3.189	57.82
		4.68	4.775	59.82
		10.66	11.64	16.97
		14.11	13.98	30.81
		22	17.59	0
		0	24.74	39.93
		0	0	3.21
		17.99	23.69
		0	16.38
		0	16.59
		11.26	12.82
Figure 7E: Plaque assay of the DTgTRPPL-2 mutant and the parental strain in the presence of ACA (1 mM), benzamil (10 mM) and cilnidipine (40 mM) after 7 days of growth.
		Summary statistics
		Parental				DTgTRPPL-2
		ND	ACA	Benzamil	Cilnidipine	ND	ACA	Benzamil	Cilnidipine
		9	3	3	0	4	6	3	0
		7	2	3	0	4	4	4	0
		8	3	2	0	2	4	4	0
		31	4	3	0	4	2	4	0
		13	4	4	0	3	3	3	0
		18	3	4	0	4	4	3	0
		19	4	3	0	4	4	4	0
		16	2	3	0	4	6	2	0
		16	3	3	0	4	4	2	0
		15	3	6	0	4	3	4	0
		20	2	4	0	5	4	3	0
		20	4	3	0	4	2	5	0
		13	6	2	0	3	4	3	0
		16	4	3	0	5	3	3	0
		16	4	3	0	4	2	4	0
		16	3	2	0	4	3	6	0
		21	3	3	0	5	4	4	0
		22	3	3	0	7	4	3	0
		9	2	3	0	5	3	3	0
		9	2	2	0	3	4	3	0
		11	3	2	0	3	4	3	0
		7	0.7397	4	0	4	4	3	0
		9	2	3	0	6	3	3	0
		10	2	4	0	3	2	4	0
		11	2	3	0	6	3	5	0
		12	2	3	0	6	3	4	0
		10	3	3	0	4	3	3	0
		6	3	4	0	4	2	2	0
		5	2	3	0	4	3	4	0
		7	3	4	0	4	3	3	0
		6	4		0	3	4	3	0
		6	2		0	4	3	3
		7	4		0	4	3	3
		26.3	2		0	4	3	3
		28.7	2		0	4	3	2
		9.9	2		0	5	2	4
		20.2	4		0	3	4	4
		22.6	3		0	3	4	3
		19.1	3		0	4	4	3
		11.4	4		0	4	5	2
		14.6	3		0	3	3	4
		19.6	3		0	5	3	3
		22.3	3		0	4	4	4
		15	3		0	5	3	6
		8	2		0	3	4	2
		10	4.9		0	7	7	4
		10	5.3		0	7	3	4
		8	1.9		0	6	6	3
		9	2.9		0	5	7	5
		5	3.1		0	5	8	5
		10	3.7		0	4	6	3
		9	3.3		0	4	7	4
		9	5.5		0	6	6	5
		9	3.3		0	5	5	3
		10	4.2		0	7	6	2
		12	18.5		0	6	8	3
		12	15.4		0	8	6	4
		6	19.8		0	3	10	6
		21.8	10.7		0	7	6	4
		12.4	6.9		0	3	4	2
		13.1	8.5		0	4	2	4
		14.2	6		0	3	2	4
		8.2	14.6		0	2	1	4
		21.2	6.4		0	2	3	3
		16	4.8		0	4	4	2
		11.5	3.8		0	3	3	4
		18.6	2		0	2	3	5
		12.5	4.7		0	3	3	7
		7	2.6		0	3	3	5
		5	3.4		0	3	4	4
		9	2.8		0	2	3	5
		10	3.6		0	3	2	2
		6	2.6		0	4	2	3
		7	2.9		0	5	2	4
		8	12.5		0	2	2	5
		7	12.6		0	4		4
		6	8.4		0	4		5
		8	10.1		0	3		4
		6	10.6		0	6		4
		7	11.5		0	3		4
		11	10.3		0	3
		7	6.2		0	4
		19	12.7		0	4
		12	13.3		0	3
		11			0	5
		10			0	3
		10			0	4
		11			0	3
		8			0	3
		18			0	3
		11				5
		13				4
		11				3
		11				3
		7				5
		6				3
		9				4
		9				6
		6				3
		6				4
		7				5
		7				3
		8				2
		8				5
		10				3
		9				3
		8				3
		9				4
		9				2
		8				2
		21				2
		31				2
		13				2
		14				2
		21				1
		25				2
		16				2
		19				2
		18				5
		21				2
		23				3
		38				2
		26				4
		18				4
		10				3
		27				1
		27.4				3
		29.5				2
		23.5				3
		31.4				4
		45.1				2
		24.9				3
		18.5				4
		23.2				2
		24.9				3
		8				5
		11				3
		10				4
		6				2
		7				4
		8				7
		9				1
		9				4
		6				3
		6				4
		9				5
		9				4
		7				6
		9				4
		7				3
		7				4
		7				6
		9				4
		10				3
		8				6
		7				4
		8				4
		11				7
		9				5
		7				4
		13				6
		8				5
		10				3
		7				7
		14				3
		5				4
		7				6
		8				7
		11				5
		7				4
		8				6
		28.4				5
		36.3				5
		38.8				5
		20.4				4
		22.8				4
		32.3				6
		34.2				4
		20.8				3
		39.3				4
		32.4				4
		10				3
		10				5
		10				4
		10				5
		5				5
		10				5
		6				5
		6				4
		5				2
		10				4
		7				5
		6				3
		10				5
		8				5
		11				3
		10				3
		9				3
		8				3
		9				5
		11
		9
		9
		11
		10
		8
		6
		11
		7
		8
		9
		6
		10
		9
		12
		19
		12
		11
		15
		12
		20
		12
		11
		15
		8
		12
		12
		14
		21
		12
		11
		16
		13
		17
		13
		17
		19
		9
		12
		13
		11
		11
		14
		12
		14
		10
		11
		11
		10
		11
		13
		17
		21
		12
		11
		9
