# Supplementary material for: Calcium signaling through a transient receptor channel is important for Toxoplasma gondii growth
Source: eLife journal article supplement (doi:10.7554/elife.63417), 2021-06-09
Supplement: supp [file elife-63417-supp-v1.zip › elife_poa_e63417_Supplementary_file_2_source_data_1.xlsx]

## Sheet: Sheet1
Suplementary File 2 Source Data 1
			Biological Replicate 1				Biological replicate 2
	Accession	Description	Score A4	Coverage A4	# Peptides A4	# PSM A4	Score B4	Coverage B4	# Peptides B4	# PSM B4	# AAs	MW [kDa]	calc. pI
	TGGT1_310560-t26_1-p1	transcript=TGGT1_310560-t26_1 | gene=TGGT1_310560 | organism=Toxoplasma_gondii_GT1 | gene_product=hypothetical protein | transcript_product=hypothetical protein | location=TGGT1_chrXI:1401013-1417344(+) | protein_length=2191 | sequence_SO=chromosome | SO=protein_coding | is_pseudo=false	85.6133	1.55	3	3	70.6119	1.28	3	3	2191	237.34	6.41748
	TGGT1_280560-t26_1-p1	transcript=TGGT1_280560-t26_1 | gene=TGGT1_280560 | organism=Toxoplasma_gondii_GT1 | gene_product=selenide, water dikinase | transcript_product=selenide, water dikinase | location=TGGT1_chrVIIa:275729-285116(-) | protein_length=1298 | sequence_SO=chromosome | SO=protein_coding | is_pseudo=false	314.755	7.47	8	9	97.129	3.24	4	4	1298	137.788	7.00537
	TGGT1_209030-t26_1-p1	transcript=TGGT1_209030-t26_1 | gene=TGGT1_209030 | organism=Toxoplasma_gondii_GT1 | gene_product=actin ACT1 | transcript_product=actin ACT1 | location=TGGT1_chrIb:1014618-1016180(+) | protein_length=376 | sequence_SO=chromosome | SO=protein_coding | is_pseudo=false	204.106	15.96	6	7	64.86	5.59	2	2	376	41.8809	5.16064
	TGGT1_228170-t26_1-p1	transcript=TGGT1_228170-t26_1 | gene=TGGT1_228170 | organism=Toxoplasma_gondii_GT1 | gene_product=inner membrane complex protein IMC2A | transcript_product=inner membrane complex protein IMC2A | location=TGGT1_chrX:431147-436956(-) | protein_length=1596 | sequence_SO=chromosome | SO=protein_coding | is_pseudo=false	172.964	4.64	7	7	91.6986	2.38	4	4	1596	182.222	5.93506
	TGGT1_212300-t26_1-p1	transcript=TGGT1_212300-t26_1 | gene=TGGT1_212300 | organism=Toxoplasma_gondii_GT1 | gene_product=hypothetical protein | transcript_product=hypothetical protein | location=TGGT1_chrX:3837742-3842895(+) | protein_length=683 | sequence_SO=chromosome | SO=protein_coding | is_pseudo=false	132.28	5.86	4	4	85.29	3.07	2	2	683	75.6296	6.50732
	TGGT1_214300-t26_1-p1	transcript=TGGT1_214300-t26_1 | gene=TGGT1_214300 | organism=Toxoplasma_gondii_GT1 | gene_product=hypothetical protein | transcript_product=hypothetical protein | location=TGGT1_chrX:6111323-6132665(+) | protein_length=2379 | sequence_SO=chromosome | SO=protein_coding | is_pseudo=false	130.113	1.64	3	3					2379	258.824	7.15186
	TGGT1_359490-t26_1-p1	transcript=TGGT1_359490-t26_1 | gene=TGGT1_359490 | organism=Toxoplasma_gondii_GT1 | gene_product=elongation factor 1-alpha | transcript_product=elongation factor 1-alpha | location=AAQM03000543:18-874(-) | protein_length=285 | sequence_SO=contig | SO=protein_coding | is_pseudo=false	120.906	15.44	5	5	143.42	17.54	6	6	285	31.0558	8.35303
	TGGT1_321440-t26_1-p1	transcript=TGGT1_321440-t26_1 | gene=TGGT1_321440 | organism=Toxoplasma_gondii_GT1 | gene_product=SWI2/SNF2 ISWI-like SANT | transcript_product=SWI2/SNF2 ISWI-like SANT | location=TGGT1_chrIb:1813361-1823041(+) | protein_length=1249 | sequence_SO=chromosome | SO=protein_coding | is_pseudo=false	77.4476	1.36	2	2					1249	140.064	6.84424
	TGGT1_247370-t26_1-p1	transcript=TGGT1_247370-t26_1 | gene=TGGT1_247370 | organism=Toxoplasma_gondii_GT1 | gene_product=hypothetical protein | transcript_product=hypothetical protein | location=TGGT1_chrXII:3219229-3227900(+) | protein_length=1261 | sequence_SO=chromosome | SO=protein_coding | is_pseudo=false	55.6696	1.43	2	2		0			1261	140.905	6.7417
	TGGT1_226960-t26_1-p1	transcript=TGGT1_226960-t26_1 | gene=TGGT1_226960 | organism=Toxoplasma_gondii_GT1 | gene_product=phosphofructokinase PFKII | transcript_product=phosphofructokinase PFKII | location=TGGT1_chrX:1093641-1104060(-) | protein_length=1225 | sequence_SO=chromosome | SO=protein_coding | is_pseudo=false		0			63.67	1.31	2	3	1225	131.279	6.23975
	TGGT1_226250-t26_1-p1	transcript=TGGT1_226250-t26_1 | gene=TGGT1_226250 | organism=Toxoplasma_gondii_GT1 | gene_product=DEAD (Asp-Glu-Ala-Asp) box polypeptide DDX3X | transcript_product=DEAD (Asp-Glu-Ala-Asp) box polypeptide DDX3X | location=TGGT1_chrX:1667417-1670378(+) | protein_length=734 | sequence_SO=chromosome | SO=protein_coding | is_pseudo=false		0			81.2376	3.27	2	3	734	78.5436	9.08545
	TGGT1_263060-t26_1-p1	transcript=TGGT1_263060-t26_1 | gene=TGGT1_263060 | organism=Toxoplasma_gondii_GT1 | gene_product=Proteasome/cyclosome repeat-containing protein | transcript_product=Proteasome/cyclosome repeat-containing protein | location=TGGT1_chrVIIb:808221-820240(-) | protein_length=988 | sequence_SO=chromosome | SO=protein_coding | is_pseudo=false		0			55.4341	1.62	2	2	988	107.123	5.24951
	TGGT1_201680-t26_1-p1	transcript=TGGT1_201680-t26_1 | gene=TGGT1_201680 | organism=Toxoplasma_gondii_GT1 | gene_product=putative eukaryotic initiation factor-3 subunit 10 | transcript_product=putative eukaryotic initiation factor-3 subunit 10 | location=TGGT1_chrVIIa:3754116-3762345(+) | protein_length=1031 | sequence_SO=chromosome | SO=protein_coding | is_pseudo=false					211.827	5.04	6	9	1031	118.783	8.73389
	TGGT1_205540-t26_1-p1	transcript=TGGT1_205540-t26_1 | gene=TGGT1_205540 | organism=Toxoplasma_gondii_GT1 | gene_product=DEAD/DEAH box helicase domain-containing protein | transcript_product=DEAD/DEAH box helicase domain-containing protein | location=TGGT1_chrVIIa:1258363-1265405(+) | protein_length=1064 | sequence_SO=chromosome | SO=protein_coding | is_pseudo=false					60.5023	2.26	2	2	1064	116.067	9.05615
	TGGT1_209600-t26_1-p1	transcript=TGGT1_209600-t26_1 | gene=TGGT1_209600 | organism=Toxoplasma_gondii_GT1 | gene_product=hypothetical protein | transcript_product=hypothetical protein | location=TGGT1_chrIb:1372263-1374087(-) | protein_length=451 | sequence_SO=chromosome | SO=protein_coding | is_pseudo=false					60.75	4.43	2	2	451	50.1698	5.30029
	TGGT1_308920-t26_1-p1	transcript=TGGT1_308920-t26_1 | gene=TGGT1_308920 | organism=Toxoplasma_gondii_GT1 | gene_product=splicing factor U2AF protein | transcript_product=splicing factor U2AF protein | location=TGGT1_chrXI:318912-325751(-) | protein_length=770 | sequence_SO=chromosome | SO=protein_coding | is_pseudo=false					63.85	4.16	2	2	770	83.1274	6.55127
	TGGT1_280600-t26_1-p1	transcript=TGGT1_280600-t26_1 | gene=TGGT1_280600 | organism=Toxoplasma_gondii_GT1 | gene_product=putative histidyl-tRNA synthetase (HisRS) | transcript_product=putative histidyl-tRNA synthetase (HisRS) | location=TGGT1_chrVIIa:251998-256202(-) | protein_length=1252 | sequence_SO=chromosome | SO=protein_coding | is_pseudo=false					46.5894	1.52	2	2	1252	134.79	7.54736
	TGGT1_229180-t26_1-p1	transcript=TGGT1_229180-t26_1 | gene=TGGT1_229180 | organism=Toxoplasma_gondii_GT1 | gene_product=HEAT repeat-containing protein | transcript_product=HEAT repeat-containing protein | location=TGGT1_chrVIII:71618-81573(-) | protein_length=1238 | sequence_SO=chromosome | SO=protein_coding | is_pseudo=false					109.223	2.91	3	3	1238	136.018	4.79248
