# Supplementary figures and images for: Calcium signaling through a transient receptor channel is important for Toxoplasma gondii growth
Source: eLife journal article supplement (doi:10.7554/elife.63417), 2021-06-09

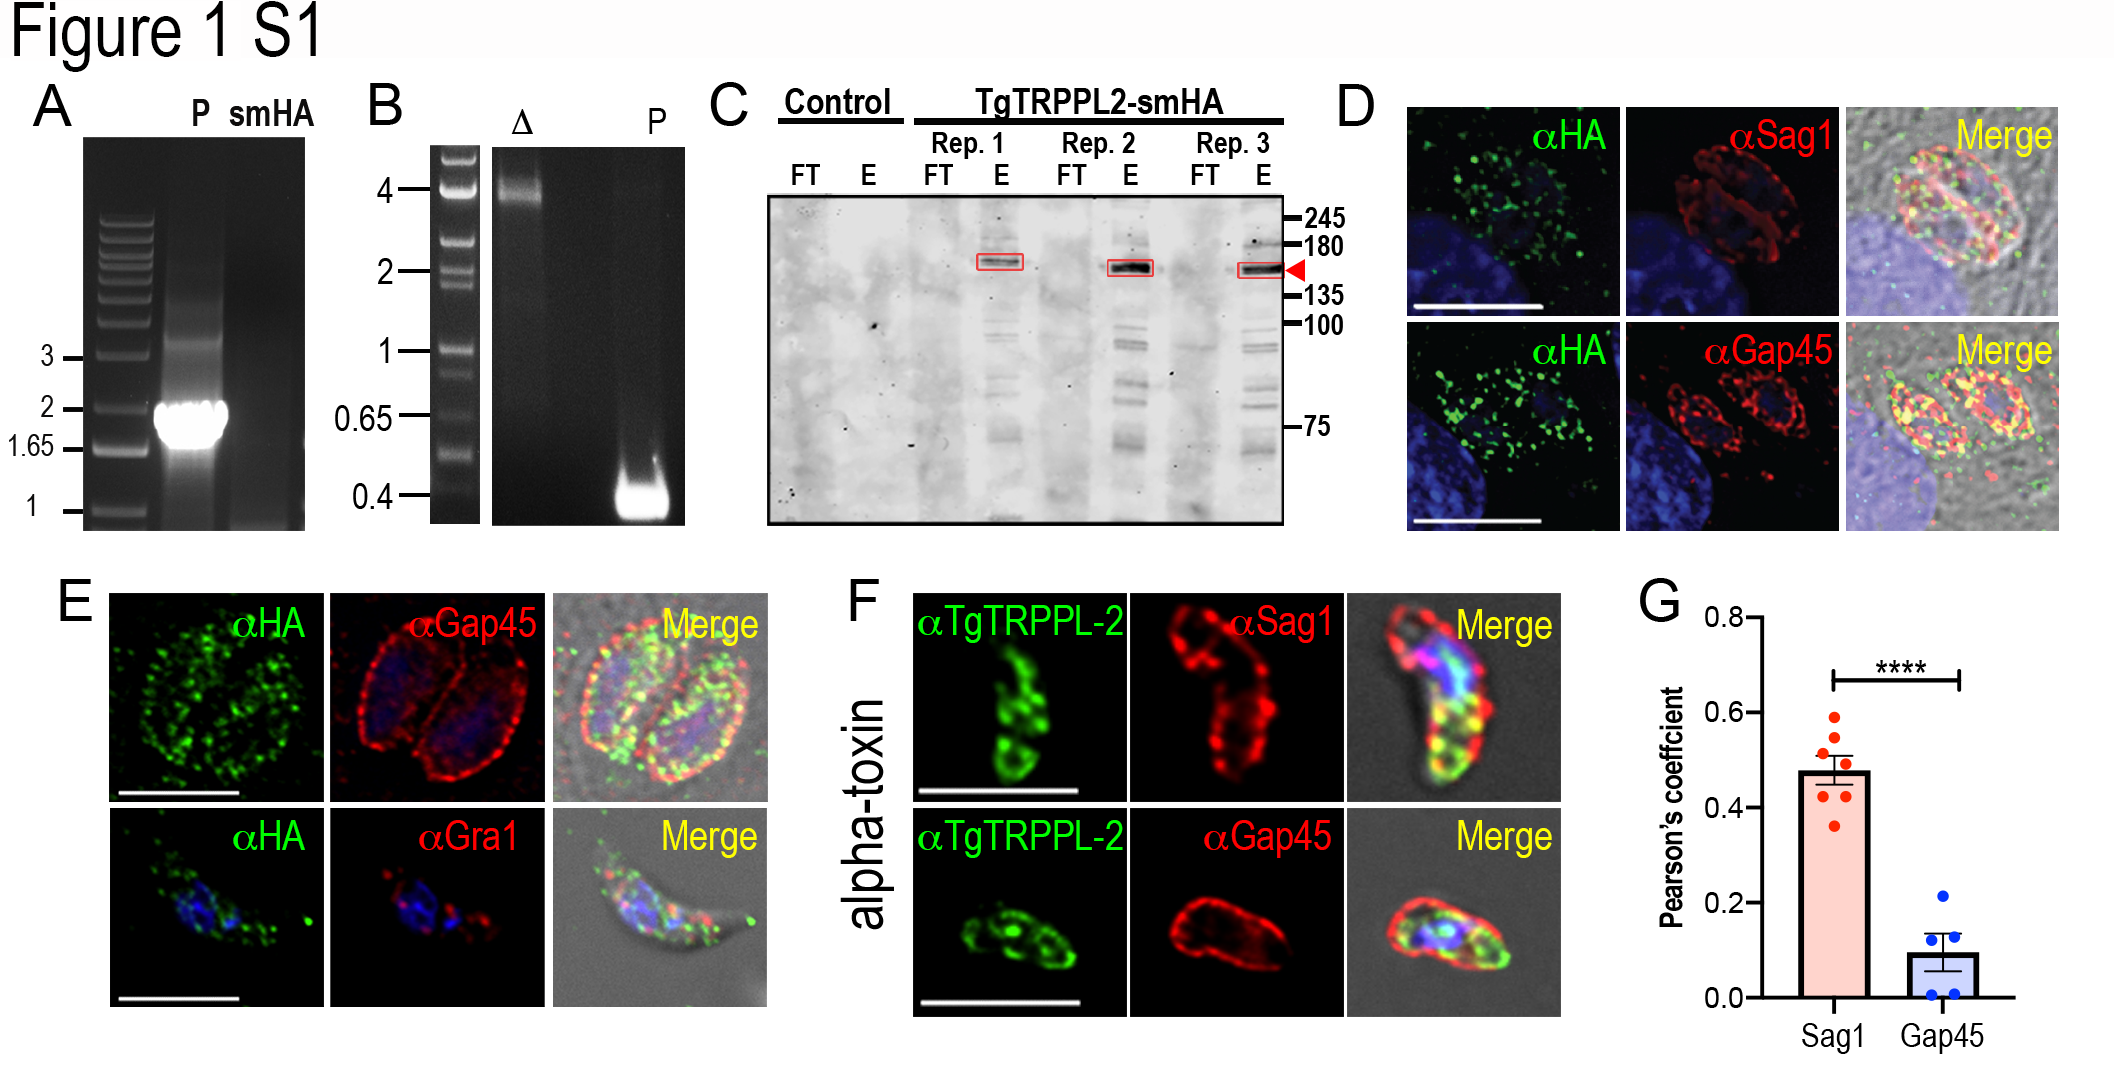

Supplement: supp [file elife-63417-supp-v1.zip › elife_poa_e63417_Figure_1_figure_supplement_1.tif]

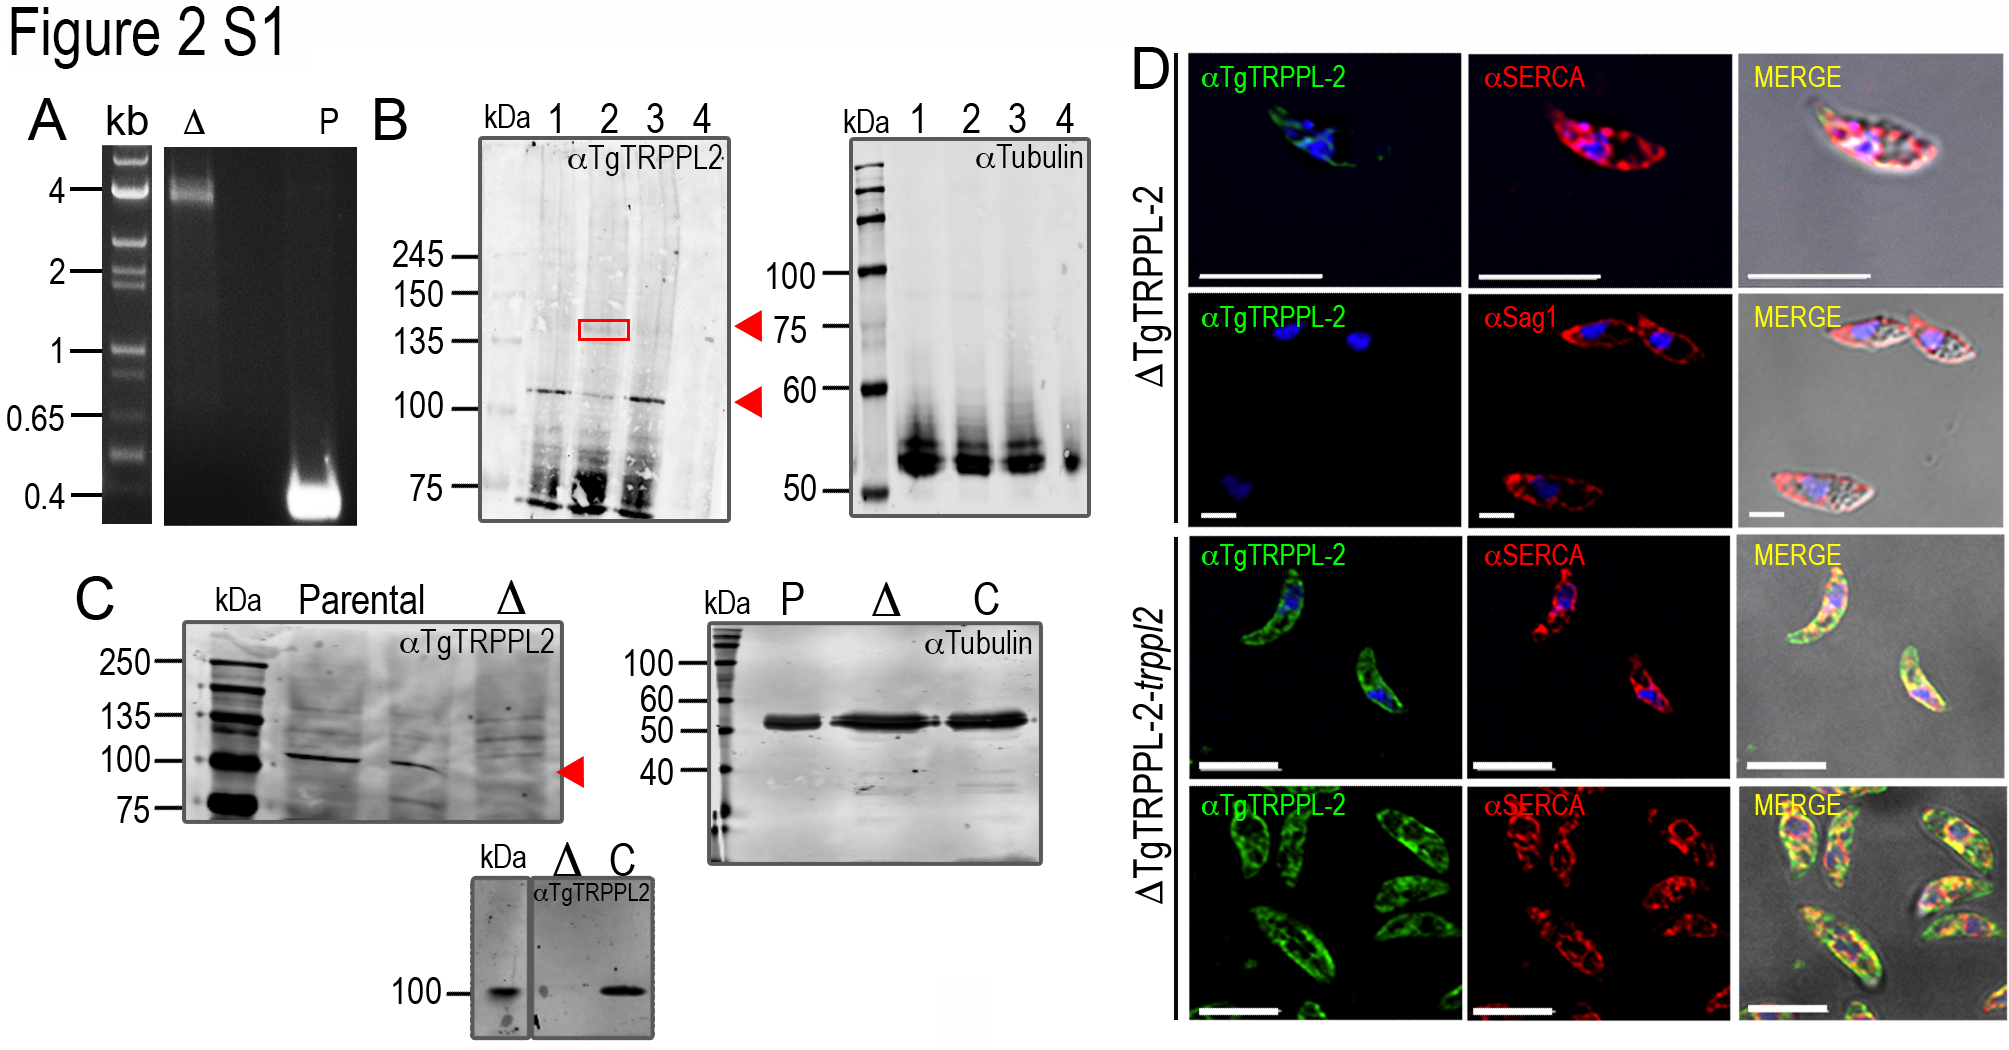

Supplement: supp [file elife-63417-supp-v1.zip › elife_poa_e63417_Figure_2_figure_supplement_1.tif]

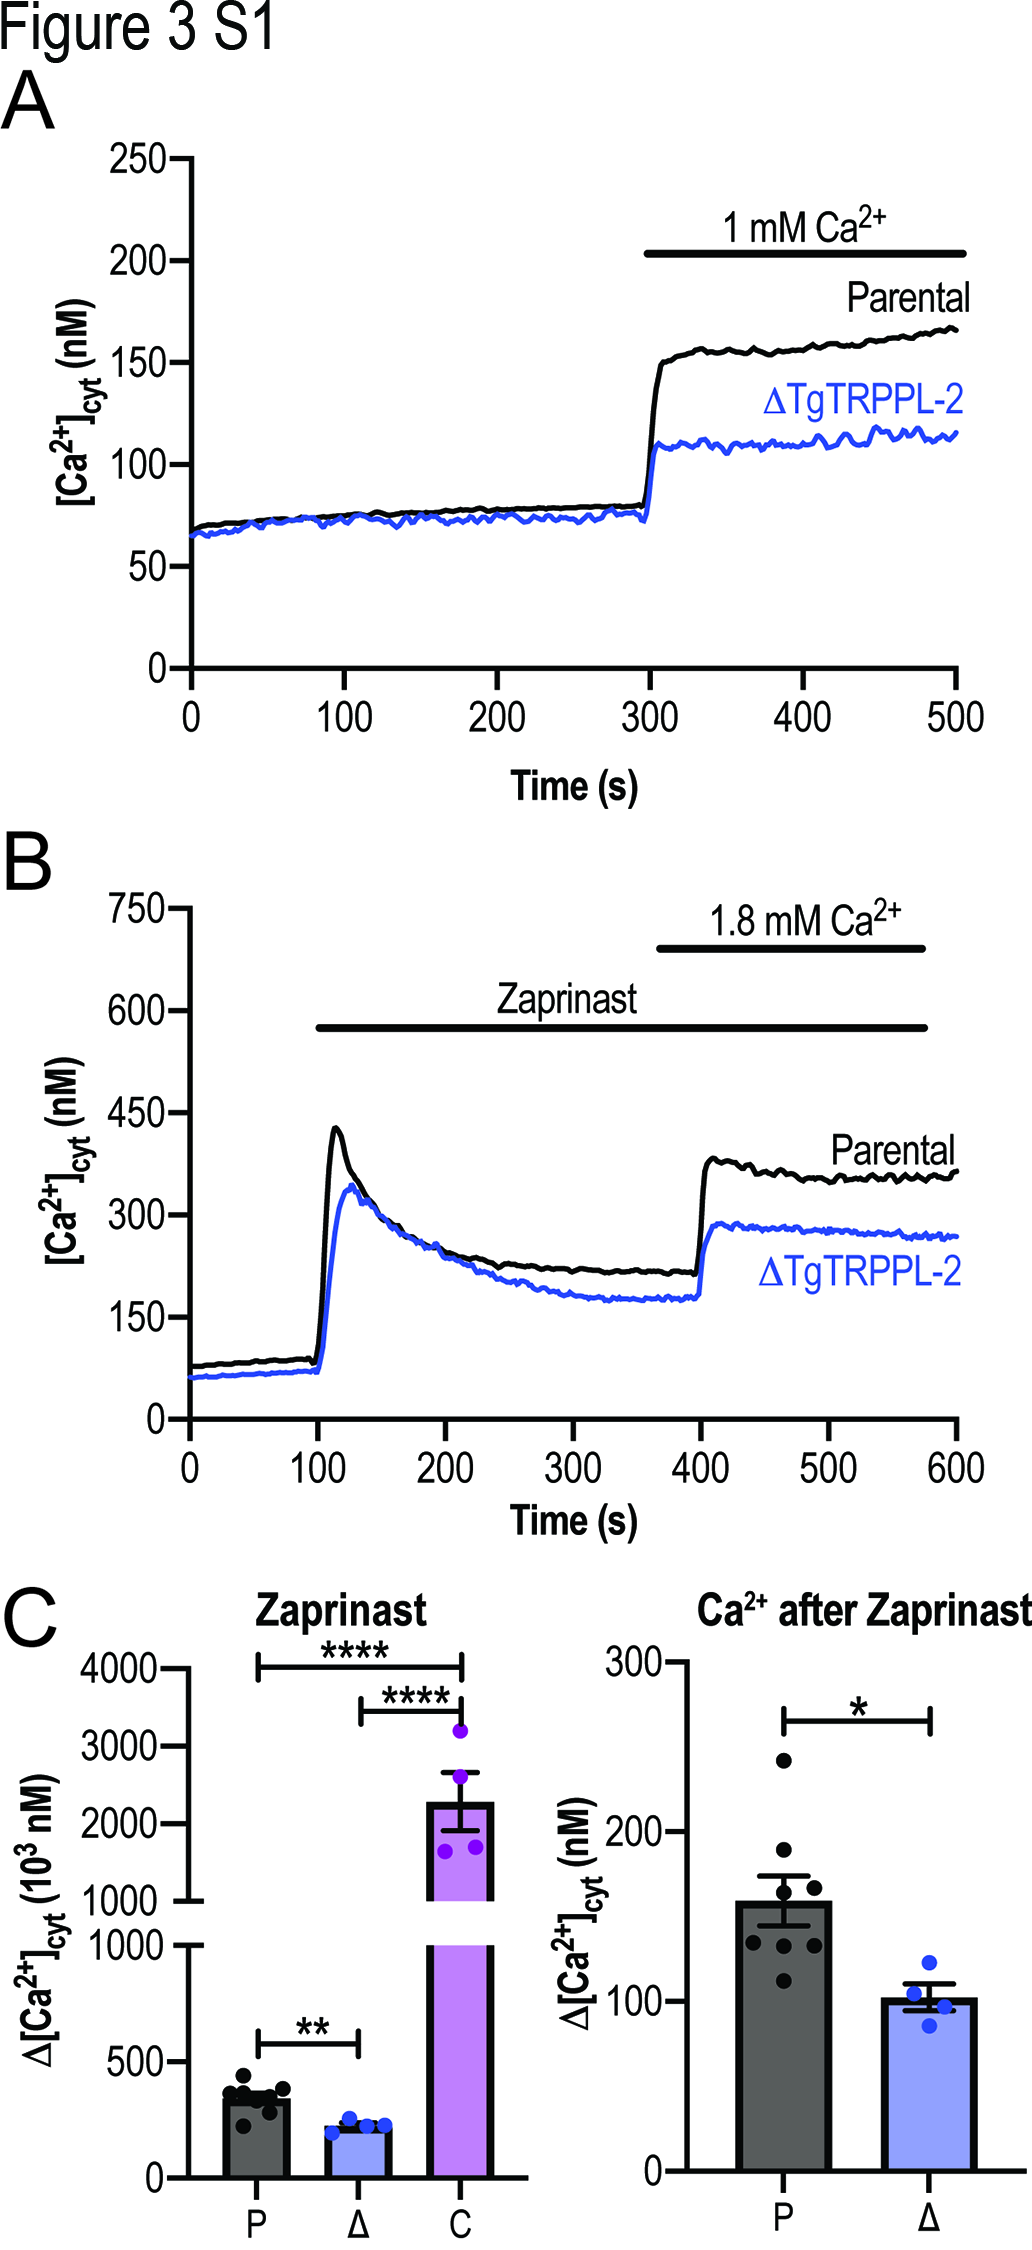

Supplement: supp [file elife-63417-supp-v1.zip › elife_poa_e63417_Figure_3_figure_supplement_1.tif]

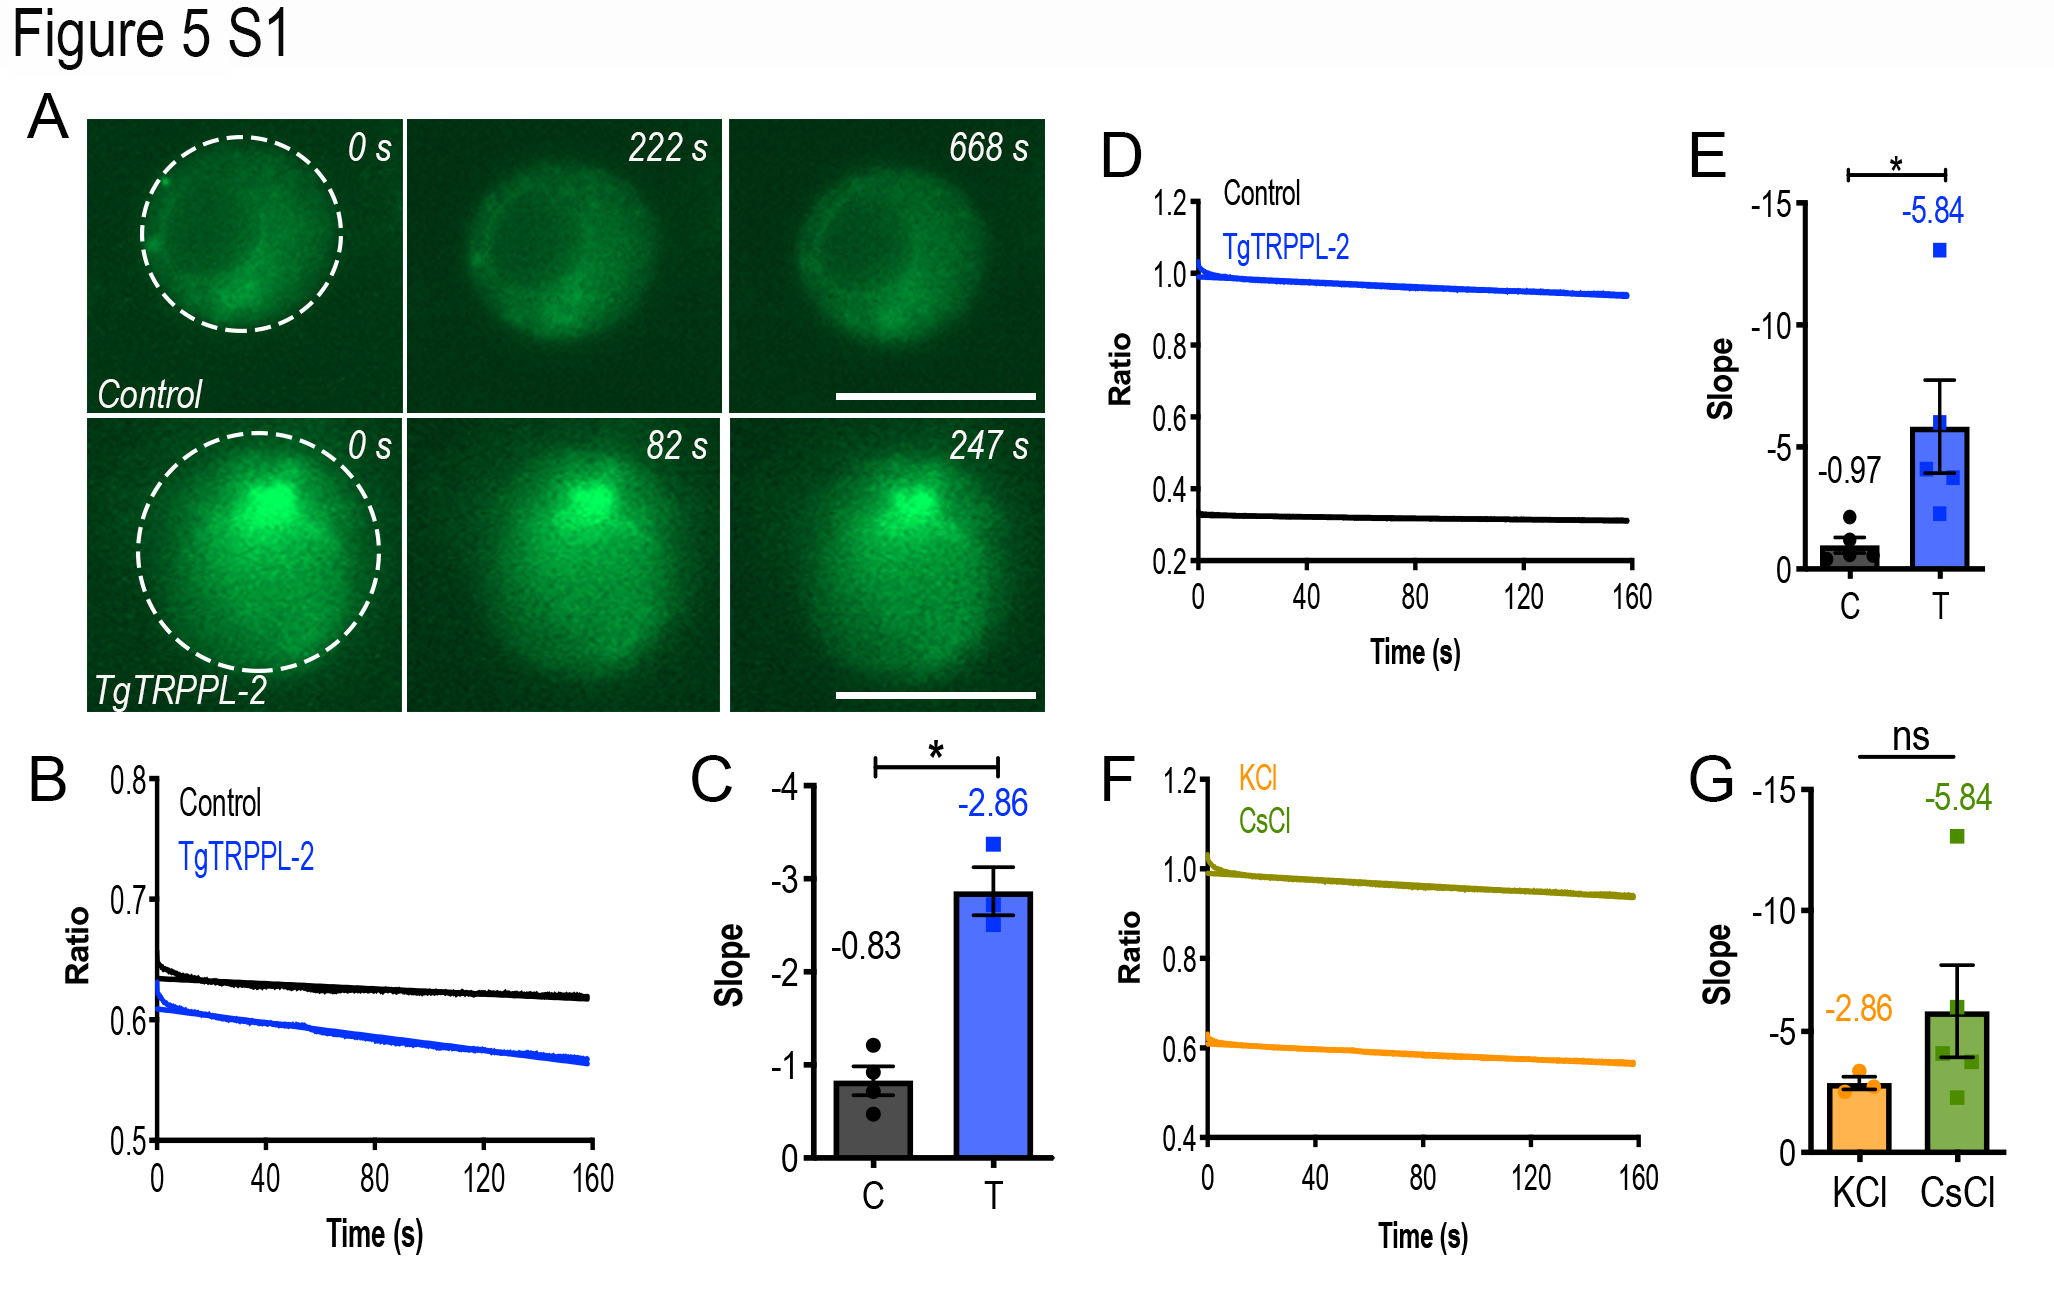

Supplement: supp [file elife-63417-supp-v1.zip › elife_poa_e63417_Figure_5_figure_supplement_1.tif]
